# Supplementary material
Source: publisher site journal article supplement (https://www.dovepress.com/article/383552)
Supplement: Supplementary file 1 [file get_supplementary_file.php]

SUPPLEMENTARY FIGURE 1

**INTERVIEW SCRIPT FOR ASSESSMENT OF UNDERSTANDING AND ACCEPTANCE RATES OF FND DIAGNOSIS**

**FUNCTIONAL SEIZURES**

Dear participant, Functional Neurological Disorders are conditions in which patients have symptoms of neurological diseases, but the etiology of the disease is functional. In your case, the FND is of the seizure subtype. Functional seizures are disabling attacks that look very similar to epilepsy or faints. People can experience shaking attacks or attacks when they simply ’blackout’ often for quite a long time. Unlike epilepsy, functional seizures are not due to abnormal electrical activity in the brain or another neurological disease. They are however due to a temporary problem in the way the nervous system are working. Often the symptoms are accompanied by feelings of frustration, fear, worry and low mood but these are not the cause of the problem. Risk factors found in patients with FS involve stress, pain and a history of trauma in their life history, although these risk factors are not always present. They are potentially treatable and reversibles from the appropriate medical and multiprofessional follow-up. (Text adapted from fndhope.org and www.neurosymptoms.org)

1) Could you say how well you understand what Functional Seizures are?

** Wait for participant to talk openly about the issue.*

2) On a scale of zero to ten, could you measure how well you understand what of Functional Seizures are?

Remember that "zero" signify "I don't understand anything about Functional Seizures" and “ten” signify "I have full understanding about Functional Seizures"

3) Could you tell us how much you accept having the diagnosis of Functional Seizures?

** Wait for participant to talk openly about the issue.*

4) On a scale of zero to ten, could you tell us how acceptable having a diagnosis of Functional Seizures is for you?

Remember that "zero" signify "Having Functional Seizures is unacceptable to me" and “ten” signify "Having Functional Seizures is totally acceptable to me"

**FUNCTIONAL MOVEMENT DISORDER**

Dear participant, Functional Neurological Disorders are conditions in which patients have symptoms of neurological diseases, but the etiology of the disease is functional. In your case, the FND is of the motor subtype. A Functional Movement Disorder means that there is abnormal movement or positioning of part of the body due to the nervous system not working properly, but not due to an underlying neurological disease. Unlike other movement disorders (e.g., Parkinson’s disease), a functional movement disorder is not caused by damage or disease of the nervous system. It is however due to a reversible problem in the way that the nervous system is working. Patients with a functional movement disorder may experience a range of distressing and disabling symptoms, such as: tremors, paralysis, difficulties in gait, weakness in the upper and lower limbs, among others. Often the symptoms are accompanied by feelings of frustration, fear, worry and low mood but these are not the cause of the problem. Risk factors found in patients with FMD involve stress, lesion, pain and a history of trauma in their life history, although these risk factors are not always present. They are potentially treatable and reversibles from the appropriate medical and multiprofessional follow-up. (Text adapted from fndhope.org and www.neurosymptoms.org).

1) Could you say how well you understand what Functional Movement Disorders are?

** Wait for participant to talk openly about the issue.*

2) On a scale of zero to ten, could you measure how well you understand what of Functional Movement Disorders are?

Remember that "zero" signify "I don't understand anything about Functional Movement Disorders " and “ten” signify "I have full understanding about Functional Movement Disorders "

3) Could you tell us how much you accept having the diagnosis of Functional Movement Disorders?

** Wait for participant to talk openly about the issue.*

4) On a scale of zero to ten, could you tell us how acceptable having a diagnosis of Functional Movement Disorders is for you?

Remember that "zero" signify "Having Functional Movement Disorders is unacceptable to me" and “ten” signify "Having Functional Movement Disorders is totally acceptable to me"
